# Supplementary material for: Plasma gradient of soluble urokinase-type plasminogen activator receptor is linked to pathogenic plasma proteome and immune transcriptome and stratifies outcomes in severe COVID-19
Source: bioRxiv or medRxiv preprint supplement (doi:10.1101/2021.06.19.21259125), 2021-06-21
Supplement: Supplementary file [file media-1.pdf]

# **Plasma gradient of soluble urokinase-type plasminogen activator receptor is linked to pathogenic plasma proteome and immune transcriptome and stratifies outcomes in severe COVID-19**

Jafar Sarif et al.

## **Supplemental information**

Supplemental table 1-4

Supplemental computing codes

Supplemental references 39-71

**Supplemental table 1:** Demography, co-morbidities and pharmacotherapy among the COVID-19 patients with ARDS

|                             | <b>All ARDS</b>                       | <b>Low sUPAR</b>                       | <b>High sUPAR</b>                   |
|-----------------------------|---------------------------------------|----------------------------------------|-------------------------------------|
| <b>Demography</b>           |                                       |                                        |                                     |
| Male                        | N=55, 71.43 %,<br>Age=62±12.12 years  | N=36, 46.75%,<br>Age=59.5± 11.98 years | N=19, 24.68%,<br>Age=69±12.41 years |
| Female                      | N=22, 28.57%,<br>Age=59.5±10.03 years | N=16, 20.78%,<br>Age=59.5±10.22 years  | N=6, 7.79%,<br>Age=59.5±10.45 years |
| <b>Major co-morbidities</b> |                                       |                                        |                                     |
| Type 2 diabetes             | N=46, 59.74%                          | N=33, 42.86%%                          | N13=, 16.88%                        |
| Hypertension                | N=34, 44.16%                          | N=27, 35.06%                           | N=7, 9.09%                          |
| <b>Pharmacotherapy</b>      |                                       |                                        |                                     |
| Standard-of-care            | N=77, 100%                            | N=52, 100%                             | N=25, 100%                          |
| Corticosteroids             | N=52, 67.53%                          | N=39, 50.65%                           | N=13, 16.88%                        |
| Remdesivir                  | N=25, 32.47%                          | N=20, 25.97%                           | N=5, 6.49%                          |
| Convalescent plasma         | N=39, 50.65%                          | N=26, 33.77%                           | N=13, 16.88%                        |

**Supplemental table 2:** List of proteins detected in the proteomics study on plasma from severe COVID-19 patients

| Index | Peak Name                      | Group                                                                                       |
|-------|--------------------------------|---------------------------------------------------------------------------------------------|
| 1     | sp P02768 ALBU_HUMAN           | Serum albumin OS=Homo sapiens OX=9606 GN=ALB PE=1 SV=2                                      |
| 2     | sp P04114 APOB_HUMAN           | Apolipoprotein B-100 OS=Homo sapiens OX=9606 GN=APOB PE=1 SV=2                              |
| 3     | sp P01024 CO3_HUMAN            | Complement C3 OS=Homo sapiens OX=9606 GN=C3 PE=1 SV=2                                       |
| 4     | sp P01023 A2MG_HUMAN           | Alpha-2-macroglobulin OS=Homo sapiens OX=9606 GN=A2M PE=1 SV=3                              |
| 5     | sp P02787 TRFE_HUMAN           | Serotransferrin OS=Homo sapiens OX=9606 GN=TF PE=1 SV=3                                     |
| 6     | sp P0C0L4 CO4A_HUMAN           | Complement C4-A OS=Homo sapiens OX=9606 GN=C4A PE=1 SV=2                                    |
| 7     | sp P00450 CERU_HUMAN           | Ceruloplasmin OS=Homo sapiens OX=9606 GN=CP PE=1 SV=1                                       |
| 8     | sp P01009 A1AT_HUMAN           | Alpha-1-antitrypsin OS=Homo sapiens OX=9606 GN=SERPINA1 PE=1 SV=3                           |
| 9     | tr A0A0A0MS08 A0A0A0MS08_HUMAN | Immunoglobulin heavy constant gamma 1 (Fragment) OS=Homo sapiens OX=9606 GN=IGHG1 PE=1 SV=1 |
| 10    | sp P02751 FINC_HUMAN           | Fibronectin OS=Homo sapiens OX=9606 GN=FN1 PE=1 SV=4                                        |
| 11    | sp P02671 FIBA_HUMAN           | Fibrinogen alpha chain OS=Homo sapiens OX=9606 GN=FGA PE=1 SV=2                             |
| 12    | sp P08603 CFAH_HUMAN           | Complement factor H OS=Homo sapiens OX=9606 GN=CFH PE=1 SV=4                                |
| 13    | sp P02675 FIBB_HUMAN           | Fibrinogen beta chain OS=Homo sapiens OX=9606 GN=FGB PE=1 SV=2                              |
| 14    | sp P00738 HPT_HUMAN            | Haptoglobin OS=Homo sapiens OX=9606 GN=HP PE=1 SV=1                                         |
| 15    | tr B4E1Z4 B4E1Z4_HUMAN         | cDNA FLJ55673, highly similar to Complement factor B OS=Homo sapiens OX=9606 PE=1 SV=1      |
| 16    | sp P02679 FIBG_HUMAN           | Fibrinogen gamma chain OS=Homo sapiens OX=9606 GN=FGG PE=1 SV=3                             |
| 17    | sp P00747 PLMN_HUMAN           | Plasminogen OS=Homo sapiens OX=9606 GN=PLG PE=1 SV=2                                        |
| 18    | tr B7ZKJ8 B7ZKJ8_HUMAN         | ITIH4 protein OS=Homo sapiens OX=9606 GN=ITIH4 PE=1 SV=1                                    |
| 19    | sp P02774 VTDB_HUMAN           | Vitamin D-binding protein OS=Homo sapiens OX=9606 GN=GC PE=1 SV=2                           |
| 20    | sp P02647 APOA1_HUMAN          | Apolipoprotein A-I OS=Homo sapiens OX=9606 GN=APOA1 PE=1 SV=1                               |
| 21    | sp P01031 CO5_HUMAN            | Complement C5 OS=Homo sapiens OX=9606 GN=C5 PE=1 SV=4                                       |
| 22    | sp P00734 THRB_HUMAN           | Prothrombin OS=Homo sapiens OX=9606 GN=F2 PE=1 SV=2                                         |
| 23    | tr Q5T985 Q5T985_HUMAN         | Inter-alpha-trypsin inhibitor heavy chain H2 OS=Homo sapiens OX=9606 GN=ITIH2 PE=1 SV=1     |
| 24    | sp P01871 IGHM_HUMAN           | Immunoglobulin heavy constant mu OS=Homo sapiens OX=9606 GN=IGHM PE=1 SV=4                  |
| 25    | sp P02790 HEMO_HUMAN           | Hemopexin OS=Homo sapiens OX=9606 GN=HPX PE=1 SV=2                                          |
| 26    | sp P06727 APOA4_HUMAN          | Apolipoprotein A-IV OS=Homo sapiens OX=9606 GN=APOA4 PE=1 SV=3                              |
| 27    | sp P01876 IGHA1_HUMAN          | Immunoglobulin heavy constant alpha 1 OS=Homo sapiens OX=9606 GN=IGHA1 PE=1 SV=2            |
| 28    | sp P04003 C4BPA_HUMAN          | C4b-binding protein alpha chain OS=Homo sapiens OX=9606 GN=C4BPA PE=1 SV=2                  |
| 29    | sp P01008 ANT3_HUMAN           | Antithrombin-III OS=Homo sapiens OX=9606 GN=SERPINC1 PE=1 SV=1                              |

|    |                                |                                                                                             |
|----|--------------------------------|---------------------------------------------------------------------------------------------|
| 30 | sp P01011 AACT_HUMAN           | Alpha-1-antichymotrypsin OS=Homo sapiens OX=9606 GN=SERPINA3 PE=1 SV=2                      |
| 31 | sp P68871 HBB_HUMAN            | Hemoglobin subunit beta OS=Homo sapiens OX=9606 GN=HBB PE=1 SV=2                            |
| 32 | sp P19827 ITIH1_HUMAN          | Inter-alpha-trypsin inhibitor heavy chain H1 OS=Homo sapiens OX=9606 GN=ITIH1 PE=1 SV=3     |
| 33 | sp P10643 CO7_HUMAN            | Complement component C7 OS=Homo sapiens OX=9606 GN=C7 PE=1 SV=2                             |
| 34 | sp P06396 GELS_HUMAN           | Gelsolin OS=Homo sapiens OX=9606 GN=GSN PE=1 SV=1                                           |
| 35 | sp P02765 FETUA_HUMAN          | Alpha-2-HS-glycoprotein OS=Homo sapiens OX=9606 GN=AHSG PE=1 SV=2                           |
| 36 | sp P01042 KNG1_HUMAN           | Kininogen-1 OS=Homo sapiens OX=9606 GN=KNG1 PE=1 SV=2                                       |
| 37 | sp P04217 A1BG_HUMAN           | Alpha-1B-glycoprotein OS=Homo sapiens OX=9606 GN=A1BG PE=1 SV=4                             |
| 38 | sp P02749 APOH_HUMAN           | Beta-2-glycoprotein 1 OS=Homo sapiens OX=9606 GN=APOH PE=1 SV=3                             |
| 39 | sp P02649 APOE_HUMAN           | Apolipoprotein E OS=Homo sapiens OX=9606 GN=APOE PE=1 SV=1                                  |
| 40 | sp P05155 IC1_HUMAN            | Plasma protease C1 inhibitor OS=Homo sapiens OX=9606 GN=SERPING1 PE=1 SV=2                  |
| 41 | sp P43652 AFAM_HUMAN           | Afamin OS=Homo sapiens OX=9606 GN=AFM PE=1 SV=1                                             |
| 42 | sp P13671 CO6_HUMAN            | Complement component C6 OS=Homo sapiens OX=9606 GN=C6 PE=1 SV=3                             |
| 43 | sp P10909 CLUS_HUMAN           | Clusterin OS=Homo sapiens OX=9606 GN=CLU PE=1 SV=1                                          |
| 44 | tr A0A0B4J231 A0A0B4J231_HUMAN | Immunoglobulin lambda-like polypeptide 5 OS=Homo sapiens OX=9606 GN=IGLL5 PE=1 SV=1         |
| 45 | sp P02763 A1AG1_HUMAN          | Alpha-1-acid glycoprotein 1 OS=Homo sapiens OX=9606 GN=ORM1 PE=1 SV=1                       |
| 46 | tr V9GYM3 V9GYM3_HUMAN         | Apolipoprotein A-II OS=Homo sapiens OX=9606 GN=APOA2 PE=1 SV=1                              |
| 47 | sp O75882 ATRN_HUMAN           | Attractin OS=Homo sapiens OX=9606 GN=ATRN PE=1 SV=2                                         |
| 48 | sp P25311 ZA2G_HUMAN           | Zinc-alpha-2-glycoprotein OS=Homo sapiens OX=9606 GN=AZGP1 PE=1 SV=2                        |
| 49 | sp P04196 HRG_HUMAN            | Histidine-rich glycoprotein OS=Homo sapiens OX=9606 GN=HRG PE=1 SV=1                        |
| 50 | sp P02760 AMBP_HUMAN           | Protein AMBP OS=Homo sapiens OX=9606 GN=AMBP PE=1 SV=1                                      |
| 51 | sp Q96PD5 PGRP2_HUMAN          | N-acetylmuramoyl-L-alanine amidase OS=Homo sapiens OX=9606 GN=PGLYRP2 PE=1 SV=1             |
| 52 | sp P01834 IGKC_HUMAN           | Immunoglobulin kappa constant OS=Homo sapiens OX=9606 GN=IGKC PE=1 SV=2                     |
| 53 | sp P08697 A2AP_HUMAN           | Alpha-2-antiplasmin OS=Homo sapiens OX=9606 GN=SERPINF2 PE=1 SV=3                           |
| 54 | sp P20742 PZP_HUMAN            | Pregnancy zone protein OS=Homo sapiens OX=9606 GN=PZP PE=1 SV=4                             |
| 55 | tr A0A286Y4 A0A286Y4_HUMAN     | Immunoglobulin heavy constant gamma 2 (Fragment) OS=Homo sapiens OX=9606 GN=IGHG2 PE=1 SV=1 |
| 56 | tr B4DPQ0 B4DPQ0_HUMAN         | Complement C1r subcomponent OS=Homo sapiens OX=9606 GN=C1R PE=1 SV=1                        |
| 57 | sp P09871 C1S_HUMAN            | Complement C1s subcomponent OS=Homo sapiens OX=9606 GN=C1S PE=1 SV=1                        |
| 58 | sp P02748 CO9_HUMAN            | Complement component C9 OS=Homo sapiens OX=9606 GN=C9 PE=1 SV=1                             |

|    |                                |                                                                                                                    |
|----|--------------------------------|--------------------------------------------------------------------------------------------------------------------|
|    |                                | SV=2                                                                                                               |
| 59 | sp P01019 ANGT_HUMAN           | Angiotensinogen OS=Homo sapiens OX=9606 GN=AGT PE=1 SV=1                                                           |
| 60 | sp P02766 TTHY_HUMAN           | Transthyretin OS=Homo sapiens OX=9606 GN=TTR PE=1 SV=1                                                             |
| 61 | tr G3XAM2 G3XAM2_HUMAN         | Complement factor I OS=Homo sapiens OX=9606 GN=CFI PE=1 SV=1                                                       |
| 62 | sp P02750 A2GL_HUMAN           | Leucine-rich alpha-2-glycoprotein OS=Homo sapiens OX=9606 GN=LRG1 PE=1 SV=2                                        |
| 63 | sp P60709 ACTB_HUMAN           | Actin, cytoplasmic 1 OS=Homo sapiens OX=9606 GN=ACTB PE=1 SV=1                                                     |
| 64 | sp P01880 IGHD_HUMAN           | Immunoglobulin heavy constant delta OS=Homo sapiens OX=9606 GN=IGHD PE=1 SV=3                                      |
| 65 | sp O43866 CD5L_HUMAN           | CD5 antigen-like OS=Homo sapiens OX=9606 GN=CD5L PE=1 SV=1                                                         |
| 66 | tr A0A087WW43 A0A087WW43_HUMAN | Inter-alpha-trypsin inhibitor heavy chain H3 OS=Homo sapiens OX=9606 GN=ITIH3 PE=1 SV=1                            |
| 67 | sp P27169 PON1_HUMAN           | Serum paraoxonase/arylesterase 1 OS=Homo sapiens OX=9606 GN=PON1 PE=1 SV=3                                         |
| 68 | sp P04004 VTNC_HUMAN           | Vitronectin OS=Homo sapiens OX=9606 GN=VTN PE=1 SV=1                                                               |
| 69 | sp Q08380 LG3BP_HUMAN          | Galectin-3-binding protein OS=Homo sapiens OX=9606 GN=LGALS3BP PE=1 SV=1                                           |
| 70 | sp P36955 PEDF_HUMAN           | Pigment epithelium-derived factor OS=Homo sapiens OX=9606 GN=SERPINF1 PE=1 SV=4                                    |
| 71 | sp P08185 CBG_HUMAN            | Corticosteroid-binding globulin OS=Homo sapiens OX=9606 GN=SERPINA6 PE=1 SV=1                                      |
| 72 | tr H0YAC1 H0YAC1_HUMAN         | Plasma kallikrein (Fragment) OS=Homo sapiens OX=9606 GN=KLKB1 PE=1 SV=1                                            |
| 73 | sp P05543 THBG_HUMAN           | Thyroxine-binding globulin OS=Homo sapiens OX=9606 GN=SERPINA7 PE=1 SV=2                                           |
| 74 | tr A0A3B3ISJ1 A0A3B3ISJ1_HUMAN | Vitamin K-dependent protein S OS=Homo sapiens OX=9606 GN=PROS1 PE=1 SV=1                                           |
| 75 | sp P51884 LUM_HUMAN            | Lumican OS=Homo sapiens OX=9606 GN=LUM PE=1 SV=2                                                                   |
| 76 | tr Q5VY30 Q5VY30_HUMAN         | Retinol-binding protein OS=Homo sapiens OX=9606 GN=RBP4 PE=1 SV=2                                                  |
| 77 | sp P22792 CPN2_HUMAN           | Carboxypeptidase N subunit 2 OS=Homo sapiens OX=9606 GN=CPN2 PE=1 SV=3                                             |
| 78 | tr C9JF17 C9JF17_HUMAN         | Apolipoprotein D (Fragment) OS=Homo sapiens OX=9606 GN=APOD PE=1 SV=1                                              |
| 79 | sp P35858 ALS_HUMAN            | Insulin-like growth factor-binding protein complex acid labile subunit OS=Homo sapiens OX=9606 GN=IGFALS PE=1 SV=1 |
| 80 | sp P05546 HEP2_HUMAN           | Heparin cofactor 2 OS=Homo sapiens OX=9606 GN=SERPIND1 PE=1 SV=3                                                   |
| 81 | tr A0A286YES1 A0A286YES1_HUMAN | Immunoglobulin heavy constant gamma 3 (Fragment) OS=Homo sapiens OX=9606 GN=IGHG3 PE=1 SV=1                        |
| 82 | sp P80108 PHLD_HUMAN           | Phosphatidylinositol-glycan-specific phospholipase D OS=Homo sapiens OX=9606 GN=GPLD1 PE=1 SV=3                    |
| 83 | tr J3KRPO J3KRPO_HUMAN         | Beta-Ala-His dipeptidase OS=Homo sapiens OX=9606 GN=CNDP1 PE=1 SV=2                                                |
| 84 | sp P00739 HPTR_HUMAN           | Haptoglobin-related protein OS=Homo sapiens OX=9606 GN=HPR PE=2 SV=2                                               |
| 85 | sp P19652 A1AG2_HUMAN          | Alpha-1-acid glycoprotein 2 OS=Homo sapiens OX=9606 GN=ORM2 PE=1 SV=2                                              |
| 86 | tr B0YIW2 B0YIW2_HUMAN         | Apolipoprotein C-III OS=Homo sapiens OX=9606 GN=APOC3 PE=1 SV=1                                                    |
| 87 | tr F5H7G1 F5H7G1_HUMAN         | Complement component C8 beta chain OS=Homo sapiens OX=9606 GN=C8B PE=1 SV=1                                        |

|     |                                |                                                                                             |
|-----|--------------------------------|---------------------------------------------------------------------------------------------|
| 88  | sp P69905 HBA_HUMAN            | Hemoglobin subunit alpha OS=Homo sapiens OX=9606 GN=HBA1 PE=1 SV=2                          |
| 89  | sp P07360 CO8G_HUMAN           | Complement component C8 gamma chain OS=Homo sapiens OX=9606 GN=C8G PE=1 SV=3                |
| 90  | sp P05160 F13B_HUMAN           | Coagulation factor XIII B chain OS=Homo sapiens OX=9606 GN=F13B PE=1 SV=3                   |
| 91  | sp P07357 CO8A_HUMAN           | Complement component C8 alpha chain OS=Homo sapiens OX=9606 GN=C8A PE=1 SV=2                |
| 92  | sp P01591 IGJ_HUMAN            | Immunoglobulin J chain OS=Homo sapiens OX=9606 GN=JCHAIN PE=1 SV=4                          |
| 93  | tr A0A286YFJ8 A0A286YFJ8_HUMAN | Immunoglobulin heavy constant gamma 4 (Fragment) OS=Homo sapiens OX=9606 GN=IGHG4 PE=1 SV=1 |
| 94  | tr E9PHK0 E9PHK0_HUMAN         | Tetranectin OS=Homo sapiens OX=9606 GN=CLEC3B PE=1 SV=1                                     |
| 95  | sp P80748 LV321_HUMAN          | Immunoglobulin lambda variable 3-21 OS=Homo sapiens OX=9606 GN=IGLV3-21 PE=1 SV=2           |
| 96  | tr A0A096LPE2 A0A096LPE2_HUMAN | SAA2-SAA4 readthrough OS=Homo sapiens OX=9606 GN=SAA2-SAA4 PE=4 SV=1                        |
| 97  | sp P04264 K2C1_HUMAN           | Keratin, type II cytoskeletal 1 OS=Homo sapiens OX=9606 GN=KRT1 PE=1 SV=6                   |
| 98  | tr K7ER74 K7ER74_HUMAN         | APOC4-APOC2 readthrough (NMD candidate) OS=Homo sapiens OX=9606 GN=APOC4-APOC2 PE=1 SV=1    |
| 99  | sp A0A0B4J1Y9 HV372_HUMAN      | Immunoglobulin heavy variable 3-72 OS=Homo sapiens OX=9606 GN=IGHV3-72 PE=3 SV=1            |
| 100 | sp P43251 BTD_HUMAN            | Biotinidase OS=Homo sapiens OX=9606 GN=BTD PE=1 SV=2                                        |
| 101 | tr A0A0J9YY99 A0A0J9YY99_HUMAN | Uncharacterized protein (Fragment) OS=Homo sapiens OX=9606 PE=1 SV=1                        |
| 102 | sp P29622 KAIN_HUMAN           | Kallistatin OS=Homo sapiens OX=9606 GN=SERPINA4 PE=1 SV=3                                   |
| 103 | sp O75636 FCN3_HUMAN           | Ficolin-3 OS=Homo sapiens OX=9606 GN=FCN3 PE=1 SV=2                                         |
| 104 | sp O14791 APOL1_HUMAN          | Apolipoprotein L1 OS=Homo sapiens OX=9606 GN=APOL1 PE=1 SV=5                                |
| 105 | sp P04275 VWF_HUMAN            | von Willebrand factor OS=Homo sapiens OX=9606 GN=VWF PE=1 SV=4                              |
| 106 | sp P01619 KV320_HUMAN          | Immunoglobulin kappa variable 3-20 OS=Homo sapiens OX=9606 GN=IGKV3-20 PE=1 SV=2            |
| 107 | sp P01599 KV117_HUMAN          | Immunoglobulin kappa variable 1-17 OS=Homo sapiens OX=9606 GN=IGKV1-17 PE=1 SV=2            |
| 108 | sp P23083 HV102_HUMAN          | Immunoglobulin heavy variable 1-2 OS=Homo sapiens OX=9606 GN=IGHV1-2 PE=1 SV=2              |
| 109 | sp P02747 C1QC_HUMAN           | Complement C1q subcomponent subunit C OS=Homo sapiens OX=9606 GN=C1QC PE=1 SV=3             |
| 110 | sp P00915 CAH1_HUMAN           | Carbonic anhydrase 1 OS=Homo sapiens OX=9606 GN=CA1 PE=1 SV=2                               |
| 111 | sp P02042 HBD_HUMAN            | Hemoglobin subunit delta OS=Homo sapiens OX=9606 GN=HBD PE=1 SV=2                           |
| 112 | sp P00748 FA12_HUMAN           | Coagulation factor XII OS=Homo sapiens OX=9606 GN=F12 PE=1 SV=3                             |
| 113 | tr I3L145 I3L145_HUMAN         | Sex hormone-binding globulin OS=Homo sapiens OX=9606 GN=SHBG PE=1 SV=1                      |
| 114 | sp P01714 LV319_HUMAN          | Immunoglobulin lambda variable 3-19 OS=Homo sapiens OX=9606 GN=IGLV3-19 PE=1 SV=2           |
| 115 | sp P01782 HV309_HUMAN          | Immunoglobulin heavy variable 3-9 OS=Homo sapiens OX=9606 GN=IGHV3-9 PE=1 SV=2              |
| 116 | sp P0DOY2 IGLC2_HUMAN          | Immunoglobulin lambda constant 2 OS=Homo sapiens OX=9606 GN=IGLC2 PE=1 SV=1                 |

|     |                                |                                                                                      |
|-----|--------------------------------|--------------------------------------------------------------------------------------|
| 117 | tr H9KV75 H9KV75_HUMAN         | Alpha-actinin-1 OS=Homo sapiens OX=9606 GN=ACTN1 PE=1 SV=1                           |
| 118 | sp P02743 SAMP_HUMAN           | Serum amyloid P-component OS=Homo sapiens OX=9606 GN=APCS PE=1 SV=2                  |
| 119 | tr K7ERI9 K7ERI9_HUMAN         | Apolipoprotein C-I (Fragment) OS=Homo sapiens OX=9606 GN=APOC1 PE=1 SV=1             |
| 120 | sp O95445 APOM_HUMAN           | Apolipoprotein M OS=Homo sapiens OX=9606 GN=APOM PE=1 SV=2                           |
| 121 | sp P00488 F13A_HUMAN           | Coagulation factor XIII A chain OS=Homo sapiens OX=9606 GN=F13A1 PE=1 SV=4           |
| 122 | sp P01624 KV315_HUMAN          | Immunoglobulin kappa variable 3-15 OS=Homo sapiens OX=9606 GN=IGKV3-15 PE=1 SV=2     |
| 123 | sp P04180 LCAT_HUMAN           | Phosphatidylcholine-sterol acyltransferase OS=Homo sapiens OX=9606 GN=LCAT PE=1 SV=1 |
| 124 | sp A0A0C4DH38 HV551_HUMAN      | Immunoglobulin heavy variable 5-51 OS=Homo sapiens OX=9606 GN=IGHV5-51 PE=3 SV=1     |
| 125 | sp P20851 C4BPB_HUMAN          | C4b-binding protein beta chain OS=Homo sapiens OX=9606 GN=C4BPB PE=1 SV=1            |
| 126 | sp A0A0A0MS15 HV349_HUMAN      | Immunoglobulin heavy variable 3-49 OS=Homo sapiens OX=9606 GN=IGHV3-49 PE=3 SV=1     |
| 127 | sp P00742 FA10_HUMAN           | Coagulation factor X OS=Homo sapiens OX=9606 GN=F10 PE=1 SV=2                        |
| 128 | tr D6R934 D6R934_HUMAN         | Complement C1q subcomponent subunit B OS=Homo sapiens OX=9606 GN=C1QB PE=1 SV=1      |
| 129 | sp Q9NZP8 C1RL_HUMAN           | Complement C1r subcomponent-like protein OS=Homo sapiens OX=9606 GN=C1RL PE=1 SV=2   |
| 130 | tr A0A087X0Q4 A0A087X0Q4_HUMAN | Immunoglobulin kappa variable 2-40 OS=Homo sapiens OX=9606 GN=IGKV2-40 PE=1 SV=1     |
| 131 | sp P0C0L5 CO4B_HUMAN           | Complement C4-B OS=Homo sapiens OX=9606 GN=C4B PE=1 SV=2                             |
| 132 | sp P01742 HV169_HUMAN          | Immunoglobulin heavy variable 1-69 OS=Homo sapiens OX=9606 GN=IGHV1-69 PE=1 SV=2     |
| 133 | tr B1AHL2 B1AHL2_HUMAN         | Fibulin-1 OS=Homo sapiens OX=9606 GN=FBLN1 PE=1 SV=1                                 |
| 134 | sp P01700 LV147_HUMAN          | Immunoglobulin lambda variable 1-47 OS=Homo sapiens OX=9606 GN=IGLV1-47 PE=1 SV=2    |
| 135 | sp P01602 KV105_HUMAN          | Immunoglobulin kappa variable 1-5 OS=Homo sapiens OX=9606 GN=IGKV1-5 PE=1 SV=2       |
| 136 | tr F8WF14 F8WF14_HUMAN         | Carboxylic ester hydrolase OS=Homo sapiens OX=9606 GN=BCHE PE=1 SV=1                 |
| 137 | sp P06312 KV401_HUMAN          | Immunoglobulin kappa variable 4-1 OS=Homo sapiens OX=9606 GN=IGKV4-1 PE=1 SV=1       |
| 138 | tr B1AKG0 B1AKG0_HUMAN         | Complement factor H-related protein 1 OS=Homo sapiens OX=9606 GN=CFHR1 PE=1 SV=1     |
| 139 | tr A0A0A0MRJ7 A0A0A0MRJ7_HUMAN | Coagulation factor V OS=Homo sapiens OX=9606 GN=F5 PE=1 SV=1                         |
| 140 | sp P04433 KV311_HUMAN          | Immunoglobulin kappa variable 3-11 OS=Homo sapiens OX=9606 GN=IGKV3-11 PE=1 SV=1     |
| 141 | sp P01772 HV333_HUMAN          | Immunoglobulin heavy variable 3-33 OS=Homo sapiens OX=9606 GN=IGHV3-33 PE=1 SV=2     |
| 142 | tr E9PFZ2 E9PFZ2_HUMAN         | Ceruloplasmin OS=Homo sapiens OX=9606 GN=CP PE=1 SV=1                                |
| 143 | sp A0A0C4DH33 HV124_HUMAN      | Immunoglobulin heavy variable 1-24 OS=Homo sapiens OX=9606 GN=IGHV1-24 PE=3 SV=1     |
| 144 | sp Q14520 HABP2_HUMAN          | Hyaluronan-binding protein 2 OS=Homo sapiens OX=9606 GN=HABP2 PE=1 SV=1              |
| 145 | sp P04432 KVD39_HUMAN          | Immunoglobulin kappa variable 1D-39 OS=Homo sapiens OX=9606                          |

|     |                                |                                                                                                                        |
|-----|--------------------------------|------------------------------------------------------------------------------------------------------------------------|
|     | N                              | GN=IGKV1D-39 PE=3 SV=2                                                                                                 |
| 146 | sp P0DP07 HV431_HUMAN          | Immunoglobulin heavy variable 4-31 OS=Homo sapiens OX=9606<br>GN=IGHV4-31 PE=3 SV=1                                    |
| 147 | sp P35908 K22E_HUMAN           | Keratin, type II cytoskeletal 2 epidermal OS=Homo sapiens OX=9606<br>GN=KRT2 PE=1 SV=2                                 |
| 148 | sp P13645 K1C10_HUMAN          | Keratin, type I cytoskeletal 10 OS=Homo sapiens OX=9606 GN=KRT10<br>PE=1 SV=6                                          |
| 149 | sp P08519 APOA_HUMAN           | Apolipoprotein(a) OS=Homo sapiens OX=9606 GN=LPA PE=1 SV=1                                                             |
| 150 | sp P01721 LV657_HUMAN          | Immunoglobulin lambda variable 6-57 OS=Homo sapiens OX=9606<br>GN=IGLV6-57 PE=1 SV=2                                   |
| 151 | sp P06681 CO2_HUMAN            | Complement C2 OS=Homo sapiens OX=9606 GN=C2 PE=1 SV=2                                                                  |
| 152 | sp P08571 CD14_HUMAN           | Monocyte differentiation antigen CD14 OS=Homo sapiens OX=9606<br>GN=CD14 PE=1 SV=2                                     |
| 153 | sp O95497 VNN1_HUMAN           | Pantetheinase OS=Homo sapiens OX=9606 GN=VNN1 PE=1 SV=2                                                                |
| 154 | tr G3V0E5 G3V0E5_HUMAN         | Transferrin receptor (P90, CD71), isoform CRA_c OS=Homo sapiens<br>OX=9606 GN=TFRC PE=1 SV=1                           |
| 155 | tr Q5VVP7 Q5VVP7_HUMAN         | C-reactive protein OS=Homo sapiens OX=9606 GN=CRP PE=1 SV=1                                                            |
| 156 | sp A0A0C4DH69 KV109_HUMAN      | Immunoglobulin kappa variable 1-9 OS=Homo sapiens OX=9606<br>GN=IGKV1-9 PE=3 SV=1                                      |
| 157 | tr A0A087WXI2 A0A087WXI2_HUMAN | IgGfc-binding protein (Fragment) OS=Homo sapiens OX=9606<br>GN=FCGBP PE=1 SV=2                                         |
| 158 | tr A0A024R6I7 A0A024R6I7_HUMAN | Alpha-1-antitrypsin OS=Homo sapiens OX=9606 GN=SERPINA1 PE=1<br>SV=1                                                   |
| 159 | sp A0A075B6K5 LV39_HUMAN       | Immunoglobulin lambda variable 3-9 OS=Homo sapiens OX=9606<br>GN=IGLV3-9 PE=3 SV=1                                     |
| 160 | sp A0A0C4DH68 KV224_HUMAN      | Immunoglobulin kappa variable 2-24 OS=Homo sapiens OX=9606<br>GN=IGKV2-24 PE=3 SV=1                                    |
| 161 | sp A0M8Q6 IGLC7_HUMAN          | Immunoglobulin lambda constant 7 OS=Homo sapiens OX=9606<br>GN=IGLC7 PE=1 SV=3                                         |
| 162 | sp A0A0B4J1X5 HV374_HUMAN      | Immunoglobulin heavy variable 3-74 OS=Homo sapiens OX=9606<br>GN=IGHV3-74 PE=3 SV=1                                    |
| 163 | tr A0A0C4DH35 A0A0C4DH35_HUMAN | Immunoglobulin heavy variable 3-35 (non-functional) (Fragment)<br>OS=Homo sapiens OX=9606 GN=IGHV3-35 PE=1 SV=1        |
| 164 | tr A0A0G2JSC0 A0A0G2JSC0_HUMAN | Immunoglobulin lambda variable 5-45 (Fragment) OS=Homo sapiens<br>OX=9606 GN=IGLV5-45 PE=1 SV=1                        |
| 165 | tr A0A0G2JMB2 A0A0G2JMB2_HUMAN | Immunoglobulin heavy constant alpha 2 (Fragment) OS=Homo sapiens<br>OX=9606 GN=IGHA2 PE=1 SV=1                         |
| 166 | sp A0A075B6K4 LV310_HUMAN      | Immunoglobulin lambda variable 3-10 OS=Homo sapiens OX=9606<br>GN=IGLV3-10 PE=3 SV=2                                   |
| 167 | sp P01766 HV313_HUMAN          | Immunoglobulin heavy variable 3-13 OS=Homo sapiens OX=9606<br>GN=IGHV3-13 PE=1 SV=2                                    |
| 168 | sp P01743 HV146_HUMAN          | Immunoglobulin heavy variable 1-46 OS=Homo sapiens OX=9606<br>GN=IGHV1-46 PE=1 SV=2                                    |
| 169 | sp A0A0C4DH31 HV118_HUMAN      | Immunoglobulin heavy variable 1-18 OS=Homo sapiens OX=9606<br>GN=IGHV1-18 PE=3 SV=1                                    |
| 170 | tr A0A075B7D0 A0A075B7D0_HUMAN | Immunoglobulin heavy variable 1/OR15-1 (non-functional) (Fragment)<br>OS=Homo sapiens OX=9606 GN=IGHV1OR15-1 PE=1 SV=1 |
| 171 | tr E9PQD6 E9PQD6_HUMAN         | Serum amyloid A protein OS=Homo sapiens OX=9606 GN=SAA1 PE=1<br>SV=1                                                   |
| 172 | tr A0A2Q2TTZ9 A0A2Q2TTZ9_HUMAN | Immunoglobulin kappa variable 1-33 OS=Homo sapiens OX=9606<br>GN=IGKV1D-33 PE=1 SV=1                                   |
| 173 | tr A0A075B7B8 A0A075B7B8_HUMAN | Immunoglobulin heavy variable 3/OR16-12 (non-functional)                                                               |

|     |                                |                                                                                           |
|-----|--------------------------------|-------------------------------------------------------------------------------------------|
|     | 7B8_HUMAN                      | (Fragment) OS=Homo sapiens OX=9606 GN=IGHV3OR16-12 PE=1 SV=1                              |
| 174 | sp A0A0C4DH34 HV428_HUMAN      | Immunoglobulin heavy variable 4-28 OS=Homo sapiens OX=9606 GN=IGHV4-28 PE=3 SV=1          |
| 175 | tr H0YCQ7 H0YCQ7_HUMAN         | Glutamine and serine-rich protein 1 (Fragment) OS=Homo sapiens OX=9606 GN=QSER1 PE=1 SV=1 |
| 176 | tr E5RGB5 E5RGB5_HUMAN         | Bridging integrator 3 OS=Homo sapiens OX=9606 GN=BIN3 PE=4 SV=1                           |
| 177 | tr C9J6K0 C9J6K0_HUMAN         | Secreted phosphoprotein 24 (Fragment) OS=Homo sapiens OX=9606 GN=SPP2 PE=1 SV=1           |
| 178 | tr A0A2R8YGX3 A0A2R8YGX3_HUMAN | Tropomyosin alpha-4 chain OS=Homo sapiens OX=9606 GN=TPM4 PE=1 SV=1                       |
| 179 | sp Q9HAK2 COE2_HUMAN           | Transcription factor COE2 OS=Homo sapiens OX=9606 GN=EBF2 PE=2 SV=4                       |

**Supplemental table 3: Proteins showing significantly correlated plasma abundance with plasma sUPAR concentrations**

| <b>Protein</b>                        | <b>Correlation with plasma sUPAR concentration</b> | <b>Functional attributes and potential role in pathology</b>                                                                                                                                                                                                                                                                                   | <b>Projected role in disease outcome</b> |
|---------------------------------------|----------------------------------------------------|------------------------------------------------------------------------------------------------------------------------------------------------------------------------------------------------------------------------------------------------------------------------------------------------------------------------------------------------|------------------------------------------|
| FIBA                                  | Monotonic, positive                                | FIBA or alpha fibrinogen, on cleaved by thrombin generates fibrin, the most abundant protein in a blood clot.                                                                                                                                                                                                                                  | Unfavorable                              |
| D6R934 (C1QB)                         | Monotonic, positive                                | C1QB or Complement C1Q subunit B, is a critical component of the classical complement pathway, thus has both tissue-sparing as well as tissue damaging effects depending on contexts of infections, it has been shown to upregulated in myeloid cells in COVID-19 patients [39].                                                               | Unfavorable                              |
| PHLD                                  | Threshold effect, positive                         | Phosphatidylinositol-glycan-specific phospholipase D hydrolyses GPI-anchors of several inflammatory proteins upon hydrolysis of proinflammatory cytokines like IL-1, TNF- $\alpha$ [40]                                                                                                                                                        | Unfavorable                              |
| HABP2                                 | Monotonic, positive                                | HABP2 or Hyaluronan-binding protein 2, also known as FSAP or factor VII activating protease is a critical coagulation factor [41, 42]. Increased abundance of HABP2 is known in sepsis [43].                                                                                                                                                   | Unfavorable                              |
| B7ZKJ8 (ITIH4)                        | Monotonic, positive                                | ITIH4 or Inter-alpha-trypsin inhibitor heavy chain 4, is upregulated in inflammatory contexts, mainly in response to IL-6 signaling [44]. It has also shown to upregulate in COPD [45]. Its anti-inflammatory role is evident from its protease inhibitory function and inhibition of MASP-1 and plasma kallikrein [46].                       | Favorable                                |
| APOH                                  | Monotonic, positive                                | APOH or Apolipoprotein H, also known as beta-2 glycoprotein 1, plays a role in coagulation [47, 48] with predominantly anti-coagulatory function, has been shown to increase in abundance in inflammatory contexts like COPD and SLE.                                                                                                          | Favorable                                |
| K7ER19 and K7ER74 (APOC1 and APOC4-2) | Monotonic, positive                                | Apolipoprotein C1 as well as C4 and C2 associates with triglyceride-rich lipoproteins and HDL and thus is critical in lipid metabolism and play a role in antiinflammatory role of HDL [49]. In addition APOC1 is known to be reduced in sepsis associated inflammation and shown to seclude bacterial TLR4 ligands in such contexts [50, 51]. | Favorable                                |
| E5RGB5 (BIN3)                         | Monotonic, positive                                | BIN3 or Bridging integrator 3, is a protein implicated in endocytic pathways [52].                                                                                                                                                                                                                                                             | Favorable?                               |
| CAH1                                  | Threshold effect,                                  | CAH1 or Carbonic anhydrase 1 is member of a                                                                                                                                                                                                                                                                                                    | Unfavorable                              |

|              |                            |                                                                                                                                                                                                                                                                                                                          |                                  |
|--------------|----------------------------|--------------------------------------------------------------------------------------------------------------------------------------------------------------------------------------------------------------------------------------------------------------------------------------------------------------------------|----------------------------------|
|              | positive                   | ubiquitously expressed family of enzymes that catalyze reversible hydration of carbon dioxide to bicarbonate and protons. Interestingly a pro-inflammatory role of CAH is known in macrophages as well as in mast cells [53, 54].                                                                                        |                                  |
| RBP          | Threshold effect, positive | Retinol binding protein 4 is a member of lipocalin superfamily helps in inducing proinflammatory molecule expression and also helps in lymphocyte recruitment and adherence to the endothelium by stimulating human retinal capillary endothelial cells (HRCEC) and human umbilical vein endothelial cells (HUVEC) [55]. | Unfavorable                      |
| AMBP         | Threshold effect, positive | AMBP or Alpha-1-Microglobulin/Bikunin Precursor, an anti-inflammatory proteoglycan that stabilizes extracellular matrix by interacting with hyaluronan, in combination with inter-alpha-trypsin inhibitor (ITIH1) [56, 57].                                                                                              | Favorable?                       |
| HBA          | Threshold effect, positive | Hemoglobin alpha chain, plasma hemoglobin may be indicative of a haemolytic process.                                                                                                                                                                                                                                     | Unfavorable<br>Hemolytic anemia? |
| HBB          | Threshold effect, positive | Hemoglobin beta chain, plasma hemoglobin may be indicative of a haemolytic process.                                                                                                                                                                                                                                      | Unfavorable<br>Hemolytic anemia? |
| CO3          | Monotonic, negative        | CO3 or Complement 3, is a key component for both classical and alternative pathways of complement activation. Proteolytic cleavage of C3 leads to the active forms which play roles in opsonization and anaphylaxis. Reduction in C3 levels has been found to be linked with worse outcomes in COVID-19 [58].            | Unfavorable                      |
| CO9          | Monotonic, negative        | CO9 or complement component 9, is a major component of the membrane attack complex (MAC) formed as the final outcome of complement activation. Depletion of plasma CO9 may indicate its increased consumption due to recruitment of it in cell-surface MACs [59].                                                        | Unfavorable                      |
| CFAH         | Monotonic, negative        | CFAH or complement factor H, is a regulatory glycoprotein for complement activation which prevents host cell damage by binding to C3 [60].                                                                                                                                                                               | Unfavorable                      |
| G3XAM2 (CFI) | Monotonic, negative        | G3XAM2 (CFI) or Complement factor I, inhibits complement activation by cleaving C3b and C4b [61]. Genetic abnormalities of CFI have been associated with complement mediated hemolysis [62].                                                                                                                             | Unfavorable                      |
| THRB         | Monotonic, negative        | THRB or Thrombin, is a serine protease which drives fibrinogen to fibrin conversion thus being critical for coagulation. Depletion of circulating thrombin may indicate systemic                                                                                                                                         | Unfavorable                      |

|                 |                            |                                                                                                                                                                                                                                                                                                                                |              |
|-----------------|----------------------------|--------------------------------------------------------------------------------------------------------------------------------------------------------------------------------------------------------------------------------------------------------------------------------------------------------------------------------|--------------|
|                 |                            | coagulopathy associated with COVID-19 [63].                                                                                                                                                                                                                                                                                    |              |
| FA10            | Monotonic, negative        | FA10 or Factor X is the critical regulator of coagulation cascade which cleaves prothrombin to generate thrombin. Depletion of circulating FA10 may result from systemic coagulopathy associated with COVID-19.                                                                                                                | Unfavorable  |
| VTNC            | Monotonic, negative        | VTNC or Vitronectin is a circulating glycoprotein playing critical roles in both inhibition of coagulopathy, through inhibition of plasminogen activator inhibitor (PAI) as well as by protecting against complement-mediated cellular damage [64, 65].                                                                        | Unfavorable  |
| ACTN1           | Monotonic, negative        | ACTN1 or alpha actinin 1 is a cytoskeletal protein associated with cellular junctions with critical physiological effects in smooth muscle cells as well as epithelia and endothelial cells. Plasma level of ACTN1 may indicate smooth muscle cell injury including injury to myocardium resulting from systemic inflammation. | Favorable?   |
| A1AG1 and A1AG2 | Threshold effect, negative | Alpha 1 acid glycoprotein 1 and 2, are acute phase reactants produced by liver and peripheral tissues in response to systemic inflammation and has been shown to regulate inflammatory cells and mediators with an anti-inflammatory and anti-fibrogenic role [66, 67].                                                        | Unfavorable? |
| PLMN            | Threshold effect, negative | PLMN or plasminogen is the precursor for the fibrinolytic protein plasmin. Deficiency of peptides constituent of plasminogen may point to deficiency of the fibrinolytic process leading to systemic coagulopathy, established to be associated with COVID-19 [68].                                                            | Unfavorable  |
| ANT3            | Threshold effect, negative | ANT3 or antithrombin III, is a glycoprotein with regulatory role on intrinsic pathway of coagulation mediated by inhibition of the proteases taking part in the coagulation cascade [69].                                                                                                                                      | Unfavorable  |
| ALBU            | Threshold effect, negative | ALBU or Albumin, depletion from plasma is indicative of vascular leakage during systemic inflammation. It has been shown to be associated with hypercoagulable state associated with ANT3 reduction encountered in systemic inflammation [70].                                                                                 | Unfavorable  |
| SAMP            | Threshold effect, negative | SAMP or Serum amyloid P is an acute phase reactant of the pantraxin family known to have anti-inflammatory as well as anti-fibrogenic roles [71].                                                                                                                                                                              | Unfavorable  |
| AOA096LPE2      | Threshold effect, negative | SAA2-SAA4 readthrough, serum amyloid A proteins, are acute phase reactants induced in response to systemic inflammation, which                                                                                                                                                                                                 | Unfavorable  |

|       |                               |                                                                                                                    |           |
|-------|-------------------------------|--------------------------------------------------------------------------------------------------------------------|-----------|
|       |                               | help in immune cell recruitment.                                                                                   |           |
| APOC3 | Threshold effect,<br>negative | APOC3 or apolipoprotein C3 is associated with VLDL particles and an increased level portends hypertriglyceridemia. | Favorable |

**Supplemental table 4. Pathways enriched by differentially expressed genes between group 'a', 'b' and 'c' patients.**

**A. Enriched pathways for gradient upregulated genes**

| Pathway                                                                                                             | Total | Expected | Hits | P.Value | FDR   |
|---------------------------------------------------------------------------------------------------------------------|-------|----------|------|---------|-------|
| Destabilization of mRNA by AUF1 (hnRNP D0)                                                                          | 54    | 0.259    | 3    | 0.0021  | 0.813 |
| The citric acid (TCA) cycle and respiratory electron transport                                                      | 145   | 0.695    | 4    | 0.00478 | 0.813 |
| Deadenylation of mRNA                                                                                               | 24    | 0.115    | 2    | 0.00575 | 0.813 |
| Smooth Muscle Contraction                                                                                           | 25    | 0.12     | 2    | 0.00623 | 0.813 |
| Respiratory electron transport                                                                                      | 82    | 0.393    | 3    | 0.00685 | 0.813 |
| p75 NTR receptor-mediated signalling                                                                                | 85    | 0.407    | 3    | 0.00757 | 0.813 |
| Regulation of mRNA Stability by Proteins that Bind AU-rich Elements                                                 | 88    | 0.422    | 3    | 0.00833 | 0.813 |
| Interactions of Tat with host cellular proteins                                                                     | 2     | 0.00959  | 1    | 0.00956 | 0.813 |
| Synthesis of DNA                                                                                                    | 95    | 0.455    | 3    | 0.0103  | 0.813 |
| Activated TLR4 signalling                                                                                           | 100   | 0.479    | 3    | 0.0118  | 0.813 |
| Respiratory electron transport, ATP synthesis by chemiosmotic coupling, and heat production by uncoupling proteins. | 101   | 0.484    | 3    | 0.0121  | 0.813 |
| DNA Replication                                                                                                     | 102   | 0.489    | 3    | 0.0125  | 0.813 |
| Toll Like Receptor 4 (TLR4) Cascade                                                                                 | 103   | 0.494    | 3    | 0.0128  | 0.813 |
| Metabolism of mRNA                                                                                                  | 317   | 1.52     | 5    | 0.0164  | 0.813 |
| HIV Infection                                                                                                       | 214   | 1.03     | 4    | 0.0183  | 0.813 |
| Axonal growth stimulation                                                                                           | 4     | 0.0192   | 1    | 0.019   | 0.813 |
| Activation of CaMK IV                                                                                               | 4     | 0.0192   | 1    | 0.019   | 0.813 |
| Interleukin-1 signaling                                                                                             | 45    | 0.216    | 2    | 0.0194  | 0.813 |
| S Phase                                                                                                             | 122   | 0.585    | 3    | 0.0201  | 0.813 |
| Toll-Like Receptors Cascades                                                                                        | 123   | 0.589    | 3    | 0.0205  | 0.813 |
| Rho GTPase cycle                                                                                                    | 123   | 0.589    | 3    | 0.0205  | 0.813 |
| Signaling by Rho GTPases                                                                                            | 123   | 0.589    | 3    | 0.0205  | 0.813 |
| Metabolism of RNA                                                                                                   | 339   | 1.62     | 5    | 0.0213  | 0.813 |
| Regulation of activated PAK-2p34 by proteasome mediated degradation                                                 | 48    | 0.23     | 2    | 0.0219  | 0.813 |
| Cross-presentation of soluble exogenous antigens                                                                    | 48    | 0.23     | 2    | 0.0219  | 0.813 |

|                                                         |     |        |   |        |       |
|---------------------------------------------------------|-----|--------|---|--------|-------|
| (endosomes)                                             |     |        |   |        |       |
| Ubiquitin-dependent degradation of Cyclin D1            | 49  | 0.235  | 2 | 0.0227 | 0.813 |
| CDK-mediated phosphorylation and removal of Cdc6        | 49  | 0.235  | 2 | 0.0227 | 0.813 |
| Ubiquitin-dependent degradation of Cyclin D             | 49  | 0.235  | 2 | 0.0227 | 0.813 |
| Regulation of ornithine decarboxylase (ODC)             | 49  | 0.235  | 2 | 0.0227 | 0.813 |
| Vpu mediated degradation of CD4                         | 50  | 0.24   | 2 | 0.0236 | 0.813 |
| CaMK IV-mediated phosphorylation of CREB                | 5   | 0.024  | 1 | 0.0237 | 0.813 |
| Cell Cycle Checkpoints                                  | 131 | 0.628  | 3 | 0.0242 | 0.813 |
| Deadenylation-dependent mRNA decay                      | 51  | 0.244  | 2 | 0.0245 | 0.813 |
| Ubiquitin Mediated Degradation of Phosphorylated Cdc25A | 52  | 0.249  | 2 | 0.0254 | 0.813 |
| p53-Independent DNA Damage Response                     | 52  | 0.249  | 2 | 0.0254 | 0.813 |
| p53-Independent G1/S DNA damage checkpoint              | 52  | 0.249  | 2 | 0.0254 | 0.813 |
| Muscle contraction                                      | 52  | 0.249  | 2 | 0.0254 | 0.813 |
| SCF-beta-TrCP mediated degradation of Emi1              | 53  | 0.254  | 2 | 0.0263 | 0.813 |
| Autodegradation of the E3 ubiquitin ligase COP1         | 53  | 0.254  | 2 | 0.0263 | 0.813 |
| Stabilization of p53                                    | 54  | 0.259  | 2 | 0.0273 | 0.813 |
| Vif-mediated degradation of APOBEC3G                    | 55  | 0.264  | 2 | 0.0282 | 0.813 |
| Processing of DNA ends prior to end rejoining           | 6   | 0.0288 | 1 | 0.0284 | 0.813 |
| CREB phosphorylation through the activation of CaMKK    | 6   | 0.0288 | 1 | 0.0284 | 0.813 |
| Host Interactions of HIV factors                        | 141 | 0.676  | 3 | 0.0293 | 0.813 |
| CDT1 association with the CDC6:ORC:origin complex       | 57  | 0.273  | 2 | 0.0302 | 0.813 |
| SCF(Skp2)-mediated degradation of p27/p21               | 58  | 0.278  | 2 | 0.0311 | 0.813 |
| Cell Cycle                                              | 508 | 2.43   | 6 | 0.0312 | 0.813 |
| p53-Dependent G1/S DNA damage checkpoint                | 59  | 0.283  | 2 | 0.0321 | 0.813 |
| p53-Dependent G1 DNA Damage Response                    | 59  | 0.283  | 2 | 0.0321 | 0.813 |
| Regulation of Apoptosis                                 | 59  | 0.283  | 2 | 0.0321 | 0.813 |
| G1/S DNA Damage Checkpoints                             | 62  | 0.297  | 2 | 0.0352 | 0.813 |
| Assembly of the pre-replicative complex                 | 63  | 0.302  | 2 | 0.0362 | 0.813 |
| ER-Phagosome pathway                                    | 63  | 0.302  | 2 | 0.0362 | 0.813 |
| Nonhomologous End-joining (NHEJ)                        | 8   | 0.0383 | 1 | 0.0377 | 0.813 |
| Regulation of Insulin Secretion by Free Fatty Acids     | 8   | 0.0383 | 1 | 0.0377 | 0.813 |

|                                                                       |     |        |   |        |       |
|-----------------------------------------------------------------------|-----|--------|---|--------|-------|
| Regulation of Insulin Secretion by Fatty Acids Bound to GPR40 (FFAR1) | 8   | 0.0383 | 1 | 0.0377 | 0.813 |
| Multifunctional anion exchangers                                      | 8   | 0.0383 | 1 | 0.0377 | 0.813 |
| Cyclin E associated events during G1/S transition                     | 65  | 0.312  | 2 | 0.0384 | 0.813 |
| Degradation of beta-catenin by the destruction complex                | 65  | 0.312  | 2 | 0.0384 | 0.813 |
| Signaling by Wnt                                                      | 65  | 0.312  | 2 | 0.0384 | 0.813 |
| Activation of NF-kappaB in B Cells                                    | 66  | 0.316  | 2 | 0.0395 | 0.813 |
| Cyclin A:Cdk2-associated events at S phase entry                      | 66  | 0.316  | 2 | 0.0395 | 0.813 |
| Autodegradation of Cdh1 by Cdh1:APC/C                                 | 68  | 0.326  | 2 | 0.0417 | 0.813 |
| 2-LTR circle formation                                                | 9   | 0.0431 | 1 | 0.0423 | 0.813 |
| Axonal growth inhibition (RHOA activation)                            | 9   | 0.0431 | 1 | 0.0423 | 0.813 |
| eNOS activation                                                       | 9   | 0.0431 | 1 | 0.0423 | 0.813 |
| Switching of origins to a post-replicative state                      | 69  | 0.331  | 2 | 0.0428 | 0.813 |
| Orc1 removal from chromatin                                           | 69  | 0.331  | 2 | 0.0428 | 0.813 |
| Cell Cycle, Mitotic                                                   | 411 | 1.97   | 5 | 0.0439 | 0.813 |
| Removal of licensing factors from origins                             | 71  | 0.34   | 2 | 0.045  | 0.813 |
| Regulation of DNA replication                                         | 71  | 0.34   | 2 | 0.045  | 0.813 |
| APC/C:Cdc20 mediated degradation of Securin                           | 71  | 0.34   | 2 | 0.045  | 0.813 |
| Cytokine Signaling in Immune system                                   | 286 | 1.37   | 4 | 0.0462 | 0.813 |
| Telomere Maintenance                                                  | 72  | 0.345  | 2 | 0.0462 | 0.813 |
| Methylation                                                           | 10  | 0.0479 | 1 | 0.0469 | 0.813 |
| p75NTR regulates axonogenesis                                         | 10  | 0.0479 | 1 | 0.0469 | 0.813 |
| Signalling by NGF                                                     | 290 | 1.39   | 4 | 0.0482 | 0.813 |
| Toll Like Receptor 10 (TLR10) Cascade                                 | 74  | 0.355  | 2 | 0.0485 | 0.813 |
| Toll Like Receptor 5 (TLR5) Cascade                                   | 74  | 0.355  | 2 | 0.0485 | 0.813 |
| MyD88 cascade initiated on plasma membrane                            | 74  | 0.355  | 2 | 0.0485 | 0.813 |

## B. Enriched pathways for gradient downregulated genes

| Pathway                                                                   | Total | Expected | Hits | P.Value  | FDR     |
|---------------------------------------------------------------------------|-------|----------|------|----------|---------|
| NF-kB activation through FADD/RIP-1 pathway mediated by caspase-8 and -10 | 12    | 0.101    | 4    | 2.09E-06 | 0.00293 |
| DAI mediated induction of type I IFNs                                     | 13    | 0.109    | 3    | 0.000151 | 0.0788  |

|                                                          |     |        |   |          |        |
|----------------------------------------------------------|-----|--------|---|----------|--------|
| TRAF3-dependent IRF activation pathway                   | 14  | 0.117  | 3 | 0.000191 | 0.0788 |
| RIG-I/MDA5 mediated induction of IFN-alpha/beta pathways | 67  | 0.562  | 5 | 0.000225 | 0.0788 |
| TRAF6 mediated NF-kB activation                          | 16  | 0.134  | 3 | 0.00029  | 0.0812 |
| Cytosolic sensors of pathogen-associated DNA             | 19  | 0.159  | 3 | 0.000492 | 0.115  |
| TRAF6 mediated IRF7 activation                           | 28  | 0.235  | 3 | 0.00158  | 0.316  |
| Negative regulators of RIG-I/MDA5 signaling              | 33  | 0.277  | 3 | 0.00255  | 0.447  |
| RIP-mediated NFkB activation via DAI                     | 11  | 0.0923 | 2 | 0.00362  | 0.564  |
| Activation of Chaperone Genes by XBP1(S)                 | 46  | 0.386  | 3 | 0.00657  | 0.916  |
| Developmental Biology                                    | 417 | 3.5    | 9 | 0.00729  | 0.916  |
| Activation of Chaperones by IRE1alpha                    | 49  | 0.411  | 3 | 0.00784  | 0.916  |
| Signal regulatory protein (SIRP) family interactions     | 20  | 0.168  | 2 | 0.0119   | 1      |
| Signaling by FGFR1 fusion mutants                        | 20  | 0.168  | 2 | 0.0119   | 1      |
| cGMP effects                                             | 21  | 0.176  | 2 | 0.0131   | 1      |
| L1CAM interactions                                       | 112 | 0.939  | 4 | 0.0141   | 1      |
| Export of Viral Ribonucleoproteins from Nucleus          | 2   | 0.0168 | 1 | 0.0167   | 1      |
| NEP/NS2 Interacts with the Cellular Export Machinery     | 2   | 0.0168 | 1 | 0.0167   | 1      |
| Unfolded Protein Response                                | 66  | 0.554  | 3 | 0.0176   | 1      |
| IKK complex recruitment mediated by RIP1                 | 25  | 0.21   | 2 | 0.0183   | 1      |
| Antiviral mechanism by IFN-stimulated genes              | 69  | 0.579  | 3 | 0.0198   | 1      |
| ISG15 antiviral mechanism                                | 69  | 0.579  | 3 | 0.0198   | 1      |
| Nitric oxide stimulates guanylate cyclase                | 27  | 0.226  | 2 | 0.0212   | 1      |
| IRF3 mediated activation of type 1 IFN                   | 3   | 0.0252 | 1 | 0.025    | 1      |
| Beta oxidation of palmitoyl-CoA to myristoyl-CoA         | 3   | 0.0252 | 1 | 0.025    | 1      |
| Cam-PDE 1 activation                                     | 3   | 0.0252 | 1 | 0.025    | 1      |
| TGF-beta receptor signaling activates SMADs              | 30  | 0.252  | 2 | 0.0259   | 1      |
| Signaling by FGFR1 mutants                               | 31  | 0.26   | 2 | 0.0275   | 1      |
| Cytokine Signaling in Immune system                      | 286 | 2.4    | 6 | 0.0316   | 1      |
| Plasmalogen biosynthesis                                 | 4   | 0.0335 | 1 | 0.0331   | 1      |
| NGF processing                                           | 4   | 0.0335 | 1 | 0.0331   | 1      |
| Neurophilin interactions with VEGF and VEGFR             | 4   | 0.0335 | 1 | 0.0331   | 1      |

|                                                  |      |        |    |        |   |
|--------------------------------------------------|------|--------|----|--------|---|
| Axon guidance                                    | 292  | 2.45   | 6  | 0.0345 | 1 |
| TRIF-mediated TLR3/TLR4 signaling                | 87   | 0.73   | 3  | 0.0361 | 1 |
| MyD88-independent cascade                        | 88   | 0.738  | 3  | 0.0372 | 1 |
| Toll Like Receptor 3 (TLR3) Cascade              | 88   | 0.738  | 3  | 0.0372 | 1 |
| S6K1 signalling                                  | 5    | 0.0419 | 1  | 0.0412 | 1 |
| NOSTRIN mediated eNOS trafficking                | 5    | 0.0419 | 1  | 0.0412 | 1 |
| Immune System                                    | 1140 | 9.54   | 15 | 0.0441 | 1 |
| ATM mediated phosphorylation of repair proteins  | 6    | 0.0503 | 1  | 0.0493 | 1 |
| ATM mediated response to DNA double-strand break | 6    | 0.0503 | 1  | 0.0493 | 1 |
| ER Quality Control Compartment (ERQC)            | 6    | 0.0503 | 1  | 0.0493 | 1 |

### C. Enriched pathways for threshold upregulated genes

| Pathway                                                                                             | Total | Expected | Hits | P.Value | FDR   |
|-----------------------------------------------------------------------------------------------------|-------|----------|------|---------|-------|
| Attachment of GPI anchor to uPAR                                                                    | 7     | 0.609    | 4    | 0.0016  | 0.612 |
| Activation of BAD and translocation to mitochondria                                                 | 17    | 1.48     | 6    | 0.00227 | 0.612 |
| Pre-NOTCH Transcription and Translation                                                             | 12    | 1.04     | 5    | 0.00231 | 0.612 |
| Bile salt and organic anion SLC transporters                                                        | 12    | 1.04     | 5    | 0.00231 | 0.612 |
| AKT-mediated inactivation of FOXO1A                                                                 | 4     | 0.348    | 3    | 0.00245 | 0.612 |
| Transport of glucose and other sugars, bile salts and organic acids, metal ions and amine compounds | 95    | 8.27     | 17   | 0.00307 | 0.612 |
| L1CAM interactions                                                                                  | 112   | 9.75     | 19   | 0.00338 | 0.612 |
| AKT phosphorylates targets in the cytosol                                                           | 13    | 1.13     | 5    | 0.00349 | 0.612 |
| Regulation of Gene Expression by Hypoxia-inducible Factor                                           | 9     | 0.783    | 4    | 0.00501 | 0.731 |
| Eicosanoids                                                                                         | 5     | 0.435    | 3    | 0.00574 | 0.731 |
| Acyl chain remodeling of DAG and TAG                                                                | 5     | 0.435    | 3    | 0.00574 | 0.731 |
| Proton-coupled neutral amino acid transporters                                                      | 2     | 0.174    | 2    | 0.00756 | 0.731 |
| Signal transduction by L1                                                                           | 35    | 3.05     | 8    | 0.00893 | 0.731 |
| Pre-NOTCH Expression and Processing                                                                 | 22    | 1.91     | 6    | 0.00941 | 0.731 |
| Transmembrane transport of small molecules                                                          | 504   | 43.9     | 59   | 0.00997 | 0.731 |
| Activation of PKB                                                                                   | 6     | 0.522    | 3    | 0.0107  | 0.731 |
| RSK activation                                                                                      | 6     | 0.522    | 3    | 0.0107  | 0.731 |

|                                                                |     |       |    |        |       |
|----------------------------------------------------------------|-----|-------|----|--------|-------|
| Negative regulation of the PI3K/AKT network                    | 11  | 0.957 | 4  | 0.0114 | 0.731 |
| Signaling by EGFR                                              | 179 | 15.6  | 25 | 0.0117 | 0.731 |
| Rap1 signalling                                                | 17  | 1.48  | 5  | 0.0125 | 0.731 |
| Intrinsic Pathway for Apoptosis                                | 37  | 3.22  | 8  | 0.0126 | 0.731 |
| CD28 co-stimulation                                            | 30  | 2.61  | 7  | 0.0126 | 0.731 |
| Hemostasis                                                     | 511 | 44.5  | 59 | 0.0131 | 0.731 |
| Signaling by EGFR in Cancer                                    | 181 | 15.7  | 25 | 0.0134 | 0.731 |
| Downstream signal transduction                                 | 163 | 14.2  | 23 | 0.0135 | 0.731 |
| Activation of BH3-only proteins                                | 24  | 2.09  | 6  | 0.0146 | 0.731 |
| CTLA4 inhibitory signaling                                     | 24  | 2.09  | 6  | 0.0146 | 0.731 |
| The role of Nef in HIV-1 replication and disease pathogenesis  | 31  | 2.7   | 7  | 0.0151 | 0.731 |
| Adherens junctions interactions                                | 31  | 2.7   | 7  | 0.0151 | 0.731 |
| Fcgamma receptor (FCGR) dependent phagocytosis                 | 86  | 7.48  | 14 | 0.0157 | 0.733 |
| SLC-mediated transmembrane transport                           | 251 | 21.8  | 32 | 0.0173 | 0.74  |
| NrCAM interactions                                             | 7   | 0.609 | 3  | 0.0176 | 0.74  |
| Post-transcriptional Silencing By Small RNAs                   | 7   | 0.609 | 3  | 0.0176 | 0.74  |
| Signaling by FGFR in disease                                   | 178 | 15.5  | 24 | 0.0199 | 0.74  |
| CD28 dependent PI3K/Akt signaling                              | 19  | 1.65  | 5  | 0.0204 | 0.74  |
| Transcriptional Regulation of White Adipocyte Differentiation  | 56  | 4.87  | 10 | 0.0211 | 0.74  |
| Formation of apoptosome                                        | 3   | 0.261 | 2  | 0.0214 | 0.74  |
| Downregulation of ERBB2:ERBB3 signaling                        | 13  | 1.13  | 4  | 0.0215 | 0.74  |
| alpha-linolenic acid (ALA) metabolism                          | 13  | 1.13  | 4  | 0.0215 | 0.74  |
| alpha-linolenic (omega3) and linoleic (omega6) acid metabolism | 13  | 1.13  | 4  | 0.0215 | 0.74  |
| Kinesins                                                       | 41  | 3.57  | 8  | 0.0229 | 0.74  |
| Metabolism of lipids and lipoproteins                          | 507 | 44.1  | 57 | 0.024  | 0.74  |
| G beta:gamma signalling through PI3Kgamma                      | 27  | 2.35  | 6  | 0.0258 | 0.74  |
| Lysosome Vesicle Biogenesis                                    | 27  | 2.35  | 6  | 0.0258 | 0.74  |
| Lysine catabolism                                              | 8   | 0.696 | 3  | 0.0263 | 0.74  |
| Vitamin C (ascorbate) metabolism                               | 8   | 0.696 | 3  | 0.0263 | 0.74  |
| Nicotinate metabolism                                          | 8   | 0.696 | 3  | 0.0263 | 0.74  |

|                                                                                                |     |       |    |        |       |
|------------------------------------------------------------------------------------------------|-----|-------|----|--------|-------|
| Linoleic acid (LA) metabolism                                                                  | 8   | 0.696 | 3  | 0.0263 | 0.74  |
| Signaling by ERBB2                                                                             | 164 | 14.3  | 22 | 0.0264 | 0.74  |
| DAP12 signaling                                                                                | 164 | 14.3  | 22 | 0.0264 | 0.74  |
| Regulation of Lipid Metabolism by Peroxisome proliferator-activated receptor alpha (PPARalpha) | 76  | 6.61  | 12 | 0.0301 | 0.826 |
| HIV Infection                                                                                  | 214 | 18.6  | 27 | 0.0308 | 0.826 |
| Cell-cell junction organization                                                                | 60  | 5.22  | 10 | 0.0327 | 0.826 |
| Downstream signaling of activated FGFR                                                         | 150 | 13.1  | 20 | 0.0351 | 0.826 |
| NGF signalling via TRKA from the plasma membrane                                               | 207 | 18    | 26 | 0.0352 | 0.826 |
| Synthesis of Prostaglandins (PG) and Thromboxanes (TX)                                         | 15  | 1.31  | 4  | 0.0357 | 0.826 |
| Signalling to p38 via RIT and RIN                                                              | 15  | 1.31  | 4  | 0.0357 | 0.826 |
| Developmental Biology                                                                          | 417 | 36.3  | 47 | 0.0369 | 0.826 |
| AKT phosphorylates targets in the nucleus                                                      | 9   | 0.783 | 3  | 0.037  | 0.826 |
| Signaling by PDGF                                                                              | 189 | 16.4  | 24 | 0.0376 | 0.826 |
| Signalling to ERKs                                                                             | 37  | 3.22  | 7  | 0.0377 | 0.826 |
| ABC-family proteins mediated transport                                                         | 37  | 3.22  | 7  | 0.0377 | 0.826 |
| Arachidonic acid metabolism                                                                    | 45  | 3.92  | 8  | 0.0381 | 0.826 |
| Signaling by SCF-KIT                                                                           | 142 | 12.4  | 19 | 0.0381 | 0.826 |
| Proton-coupled monocarboxylate transport                                                       | 4   | 0.348 | 2  | 0.0403 | 0.826 |
| Signaling by FGFR                                                                              | 162 | 14.1  | 21 | 0.041  | 0.826 |
| G-protein beta:gamma signalling                                                                | 30  | 2.61  | 6  | 0.0414 | 0.826 |
| Platelet activation, signaling and aggregation                                                 | 220 | 19.1  | 27 | 0.0416 | 0.826 |
| Cell junction organization                                                                     | 89  | 7.74  | 13 | 0.0432 | 0.826 |
| ARMS-mediated activation                                                                       | 16  | 1.39  | 4  | 0.0444 | 0.826 |
| Late Phase of HIV Life Cycle                                                                   | 108 | 9.4   | 15 | 0.0463 | 0.826 |
| Transcription-coupled NER (TC-NER)                                                             | 47  | 4.09  | 8  | 0.0477 | 0.826 |
| Dual incision reaction in TC-NER                                                               | 31  | 2.7   | 6  | 0.0478 | 0.826 |
| Formation of transcription-coupled NER (TC-NER) repair complex                                 | 31  | 2.7   | 6  | 0.0478 | 0.826 |
| Amino acid transport across the plasma membrane                                                | 31  | 2.7   | 6  | 0.0478 | 0.826 |
| Trafficking of AMPA receptors                                                                  | 31  | 2.7   | 6  | 0.0478 | 0.826 |
| Glutamate Binding, Activation of AMPA Receptors                                                | 31  | 2.7   | 6  | 0.0478 | 0.826 |

|                                                 |     |      |    |        |       |
|-------------------------------------------------|-----|------|----|--------|-------|
| and Synaptic Plasticity                         |     |      |    |        |       |
| Adaptive Immune System                          | 654 | 56.9 | 69 | 0.0478 | 0.826 |
| trans-Golgi Network Vesicle Budding             | 64  | 5.57 | 10 | 0.0483 | 0.826 |
| Clathrin derived vesicle budding                | 64  | 5.57 | 10 | 0.0483 | 0.826 |
| MHC class II antigen presentation               | 118 | 10.3 | 16 | 0.0488 | 0.826 |
| RAF/MAP kinase cascade                          | 10  | 0.87 | 3  | 0.0495 | 0.826 |
| Zinc influx into cells by the SLC39 gene family | 10  | 0.87 | 3  | 0.0495 | 0.826 |
| GP1b-IX-V activation signalling                 | 10  | 0.87 | 3  | 0.0495 | 0.826 |

#### D. Enriched pathways for threshold downregulated genes

| Pathway                                                                    | Total | Expected | Hits | P.Value  | FDR   |
|----------------------------------------------------------------------------|-------|----------|------|----------|-------|
| Cell Cycle                                                                 | 508   | 49.4     | 71   | 0.000831 | 0.35  |
| Class I MHC mediated antigen processing & presentation                     | 267   | 26       | 42   | 0.00105  | 0.35  |
| Gene Expression                                                            | 1090  | 106      | 134  | 0.00115  | 0.35  |
| Nuclear Envelope Reassembly                                                | 14    | 1.36     | 6    | 0.00125  | 0.35  |
| Initiation of Nuclear Envelope Reformation                                 | 14    | 1.36     | 6    | 0.00125  | 0.35  |
| Cell Cycle Checkpoints                                                     | 131   | 12.7     | 24   | 0.00161  | 0.377 |
| Platelet activation, signaling and aggregation                             | 220   | 21.4     | 35   | 0.0022   | 0.441 |
| Immune System                                                              | 1140  | 111      | 136  | 0.00371  | 0.563 |
| Metabolism of nucleotides                                                  | 81    | 7.87     | 16   | 0.00433  | 0.563 |
| Cell Cycle, Mitotic                                                        | 411   | 39.9     | 56   | 0.00512  | 0.563 |
| Phospholipid metabolism                                                    | 135   | 13.1     | 23   | 0.00517  | 0.563 |
| N-glycan trimming in the ER and Calnexin/Calreticulin cycle                | 13    | 1.26     | 5    | 0.00566  | 0.563 |
| G1/S DNA Damage Checkpoints                                                | 62    | 6.03     | 13   | 0.00576  | 0.563 |
| Pyrimidine metabolism                                                      | 24    | 2.33     | 7    | 0.00629  | 0.563 |
| Rho GTPase cycle                                                           | 123   | 12       | 21   | 0.00718  | 0.563 |
| Signaling by Rho GTPases                                                   | 123   | 12       | 21   | 0.00718  | 0.563 |
| Metabolism of RNA                                                          | 339   | 33       | 47   | 0.00724  | 0.563 |
| Glycerophospholipid biosynthesis                                           | 86    | 8.36     | 16   | 0.0079   | 0.563 |
| Antigen Presentation: Folding, assembly and peptide loading of class I MHC | 25    | 2.43     | 7    | 0.00802  | 0.563 |

|                                                                     |     |       |    |         |       |
|---------------------------------------------------------------------|-----|-------|----|---------|-------|
| Response to elevated platelet cytosolic Ca <sup>2+</sup>            | 94  | 9.14  | 17 | 0.00838 | 0.563 |
| Deadenylation-dependent mRNA decay                                  | 51  | 4.96  | 11 | 0.00861 | 0.563 |
| Antigen processing: Ubiquitination & Proteasome degradation         | 224 | 21.8  | 33 | 0.00957 | 0.563 |
| Signaling by FGFR1 fusion mutants                                   | 20  | 1.94  | 6  | 0.00972 | 0.563 |
| p53-Dependent G1/S DNA damage checkpoint                            | 59  | 5.73  | 12 | 0.01    | 0.563 |
| p53-Dependent G1 DNA Damage Response                                | 59  | 5.73  | 12 | 0.01    | 0.563 |
| Platelet degranulation                                              | 89  | 8.65  | 16 | 0.011   | 0.592 |
| Clearance of Nuclear Envelope Membranes from Chromatin              | 10  | 0.972 | 4  | 0.0115  | 0.598 |
| Transcription-coupled NER (TC-NER)                                  | 47  | 4.57  | 10 | 0.0132  | 0.635 |
| Metabolism of mRNA                                                  | 317 | 30.8  | 43 | 0.0144  | 0.635 |
| Toll-Like Receptors Cascades                                        | 123 | 12    | 20 | 0.0145  | 0.635 |
| Mitotic M-M/G1 phases                                               | 266 | 25.9  | 37 | 0.0154  | 0.635 |
| Mitotic Anaphase                                                    | 198 | 19.2  | 29 | 0.0157  | 0.635 |
| M Phase                                                             | 233 | 22.6  | 33 | 0.0167  | 0.635 |
| ER-Phagosome pathway                                                | 63  | 6.12  | 12 | 0.0167  | 0.635 |
| Vitamin B5 (pantothenate) metabolism                                | 11  | 1.07  | 4  | 0.0167  | 0.635 |
| Calnexin/calreticulin cycle                                         | 11  | 1.07  | 4  | 0.0167  | 0.635 |
| Mitotic Metaphase and Anaphase                                      | 199 | 19.3  | 29 | 0.0168  | 0.635 |
| Nuclear Envelope Breakdown                                          | 17  | 1.65  | 5  | 0.0196  | 0.703 |
| G alpha (12/13) signalling events                                   | 80  | 7.78  | 14 | 0.0209  | 0.703 |
| Regulation of mRNA Stability by Proteins that Bind AU-rich Elements | 88  | 8.55  | 15 | 0.0214  | 0.703 |
| G1/S Transition                                                     | 113 | 11    | 18 | 0.0239  | 0.703 |
| Deadenylation of mRNA                                               | 24  | 2.33  | 6  | 0.0242  | 0.703 |
| Signaling by NOTCH1 t(7;9)(NOTCH1:M1580_K2555) Translocation Mutant | 74  | 7.19  | 13 | 0.0247  | 0.703 |
| Signaling by NOTCH1 in Cancer                                       | 74  | 7.19  | 13 | 0.0247  | 0.703 |
| Signaling by NOTCH1 PEST Domain Mutants in Cancer                   | 74  | 7.19  | 13 | 0.0247  | 0.703 |
| FBXW7 Mutants and NOTCH1 in Cancer                                  | 74  | 7.19  | 13 | 0.0247  | 0.703 |
| Signaling by NOTCH1 HD Domain Mutants in                            | 74  | 7.19  | 13 | 0.0247  | 0.703 |

|                                                                                       |     |       |    |        |       |
|---------------------------------------------------------------------------------------|-----|-------|----|--------|-------|
| Cancer                                                                                |     |       |    |        |       |
| Signaling by NOTCH1 HD+PEST Domain Mutants in Cancer                                  | 74  | 7.19  | 13 | 0.0247 | 0.703 |
| Signaling by NOTCH1                                                                   | 74  | 7.19  | 13 | 0.0247 | 0.703 |
| Synthesis of PC                                                                       | 18  | 1.75  | 5  | 0.0251 | 0.703 |
| Formation of the active cofactor, UDP-glucuronate                                     | 3   | 0.292 | 2  | 0.0265 | 0.728 |
| Mitotic G1-G1/S phases                                                                | 140 | 13.6  | 21 | 0.0287 | 0.729 |
| Autodegradation of Cdh1 by Cdh1:APC/C                                                 | 68  | 6.61  | 12 | 0.0293 | 0.729 |
| Nucleotide Excision Repair                                                            | 53  | 5.15  | 10 | 0.0294 | 0.729 |
| APC/C:Cdc20 mediated degradation of mitotic proteins                                  | 76  | 7.39  | 13 | 0.0301 | 0.729 |
| Host Interactions of HIV factors                                                      | 141 | 13.7  | 21 | 0.0308 | 0.729 |
| Activated TLR4 signalling                                                             | 100 | 9.72  | 16 | 0.0309 | 0.729 |
| Sphingolipid de novo biosynthesis                                                     | 32  | 3.11  | 7  | 0.031  | 0.729 |
| Caspase-mediated cleavage of cytoskeletal proteins                                    | 13  | 1.26  | 4  | 0.031  | 0.729 |
| Triglyceride Biosynthesis                                                             | 39  | 3.79  | 8  | 0.0312 | 0.729 |
| Stabilization of p53                                                                  | 54  | 5.25  | 10 | 0.033  | 0.743 |
| Activation of APC/C and APC/C:Cdc20 mediated degradation of mitotic proteins          | 77  | 7.48  | 13 | 0.0332 | 0.743 |
| Signalling by NGF                                                                     | 290 | 28.2  | 38 | 0.0334 | 0.743 |
| Coenzyme A biosynthesis                                                               | 8   | 0.778 | 3  | 0.0353 | 0.762 |
| Signaling by TGF-beta Receptor Complex                                                | 70  | 6.8   | 12 | 0.0358 | 0.762 |
| GPVI-mediated activation cascade                                                      | 33  | 3.21  | 7  | 0.0361 | 0.762 |
| Antigen processing-Cross presentation                                                 | 78  | 7.58  | 13 | 0.0364 | 0.762 |
| Adaptive Immune System                                                                | 654 | 63.6  | 77 | 0.0386 | 0.771 |
| Toll Like Receptor 4 (TLR4) Cascade                                                   | 103 | 10    | 16 | 0.0393 | 0.771 |
| APC/C:Cdc20 mediated degradation of Securin                                           | 71  | 6.9   | 12 | 0.0395 | 0.771 |
| Synthesis of DNA                                                                      | 95  | 9.23  | 15 | 0.0397 | 0.771 |
| Cytokine Signaling in Immune system                                                   | 286 | 27.8  | 37 | 0.0419 | 0.771 |
| S Phase                                                                               | 122 | 11.9  | 18 | 0.0469 | 0.771 |
| Cyclin E associated events during G1/S transition                                     | 65  | 6.32  | 11 | 0.047  | 0.771 |
| Loss of proteins required for interphase microtubule organization from the centrosome | 65  | 6.32  | 11 | 0.047  | 0.771 |

|                                                                                    |     |       |    |        |       |
|------------------------------------------------------------------------------------|-----|-------|----|--------|-------|
| Loss of Nlp from mitotic centrosomes                                               | 65  | 6.32  | 11 | 0.047  | 0.771 |
| MyD88:Mal cascade initiated on plasma membrane                                     | 81  | 7.87  | 13 | 0.0475 | 0.771 |
| Toll Like Receptor TLR1:TLR2 Cascade                                               | 81  | 7.87  | 13 | 0.0475 | 0.771 |
| Toll Like Receptor TLR6:TLR2 Cascade                                               | 81  | 7.87  | 13 | 0.0475 | 0.771 |
| Toll Like Receptor 2 (TLR2) Cascade                                                | 81  | 7.87  | 13 | 0.0475 | 0.771 |
| Hemostasis                                                                         | 511 | 49.7  | 61 | 0.049  | 0.771 |
| Pentose phosphate pathway (hexose monophosphate shunt)                             | 9   | 0.875 | 3  | 0.0492 | 0.771 |
| Pyrimidine salvage reactions                                                       | 9   | 0.875 | 3  | 0.0492 | 0.771 |
| Regulation of cytoskeletal remodeling and cell spreading by IPP complex components | 9   | 0.875 | 3  | 0.0492 | 0.771 |
| NOTCH1 Intracellular Domain Regulates Transcription                                | 50  | 4.86  | 9  | 0.0492 | 0.771 |
| Assembly of the RAD50-MRE11-NBS1 complex at DNA double-strand breaks               | 4   | 0.389 | 2  | 0.0496 | 0.771 |
| MRN complex relocalizes to nuclear foci                                            | 4   | 0.389 | 2  | 0.0496 | 0.771 |
| Alpha-oxidation of phytanate                                                       | 4   | 0.389 | 2  | 0.0496 | 0.771 |

## Supplemental codes for reanalysis of single cell RNA sequencing data on R:

### R code for analysis of GSE163668

```
> library(Seurat)
> library(Matrix)
> library(dplyr)
> data_dir<- 'C:/Users/dclabiicb/Documents/GSE163668 pooled 5,6'
> expression_matrix<- Read10X(data.dir = data_dir)
> sample.tmp.seurat<- CreateSeuratObject(counts = expression_matrix, min.cells = 3, min.features = 200)
> sample.tmp.seurat<- NormalizeData(sample.tmp.seurat)
> sample.tmp.seurat<- FindVariableFeatures(sample.tmp.seurat, selection.method = "vst", nfeatures = 4000)
> nCoV.integrated<- ScaleData(sample.tmp.seurat)
> nCoV.integrated<- RunPCA(nCoV.integrated, verbose = FALSE,npcs = 100)
> nCoV.integrated<- ProjectDim(object = nCoV.integrated)
> nCoV.integrated<- FindNeighbors(object = nCoV.integrated, dims = 1:50)
> nCoV.integrated<- FindClusters(object = nCoV.integrated, resolution = 1.2)
> nCoV.integrated<- RunTSNE(object = nCoV.integrated, dims = 1:50)
> DimPlot(object = nCoV.integrated, reduction = 'tsne',label = TRUE)
> print(FeaturePlot(object = nCoV.integrated, features = c('PLAUR', 'ITGAX', 'HLA-DRA'),cols = c("lightgrey","Blue")))
> HLADRA_expression = GetAssayData(object = nCoV.integrated)["HLA-DRA",]
> ITGAX_expression = GetAssayData(object = nCoV.integrated)["ITGAX",]
> neg_ids = names(which(HLADRA_expression<0.5))
> neg_cells = subset(nCoV.integrated,cells=neg_ids)
> pos_ids = names(which(ITGAX_expression>0.5))
> pos_cells = subset(neg_cells,cells=pos_ids)
> FeaturePlot(pos_cells,"PLAUR", cols=c("lightgrey", "red"))
> neg_ids = names(which(HLADRA_expression<1))
> neg_cells = subset(nCoV.integrated,cells=neg_ids)
> pos_ids = names(which(ITGAX_expression>0.3))
> pos_cells = subset(neg_cells,cells=pos_ids)
```

```
>FeaturePlot(pos_cells,"PLAUR", cols=c("lightgrey", "red"))
```

### **R code for analysis of GSE145926**

```
> library(Seurat)
```

```
> library(Matrix)
```

```
> library(dplyr)
```

```
> expression_matrix1 <- Read10X_h5(choose.files())
```

```
>sample.tmp.seurat1 <- CreateSeuratObject(counts = expression_matrix1, min.cells = 3,  
min.features = 200)
```

```
> expression_matrix2 <- Read10X_h5(choose.files())
```

```
>sample.tmp.seurat2 <- CreateSeuratObject(counts = expression_matrix2, min.cells = 3,  
min.features = 200)
```

```
>sample.tmp.seurat.combined<- merge(sample.tmp.seurat1, y = sample.tmp.seurat2)
```

```
> expression_matrix3 <- Read10X_h5(choose.files())
```

```
>sample.tmp.seurat3 <- CreateSeuratObject(counts = expression_matrix3, min.cells = 3,  
min.features = 200)
```

```
>sample.tmp.seurat.combined.mild<- merge(sample.tmp.seurat.combined, y = sample.tmp.seurat3)
```

```
>sample.tmp.seurat.combined.mild<- NormalizeData(sample.tmp.seurat.combined.mild, verbose =  
FALSE)
```

```
>sample.tmp.seurat.combined.mild<- FindVariableFeatures(sample.tmp.seurat.combined.mild,  
selection.method = "vst", nfeatures = 2000,verbose = FALSE)
```

```
>nCoV.integrated<- ScaleData(sample.tmp.seurat.combined.mild, verbose = FALSE)
```

```
>nCoV.integrated<- RunPCA(nCoV.integrated, verbose = FALSE,npcs = 100)
```

```
>nCoV.integrated.mild<- ProjectDim(object = nCoV.integrated)
```

```
>nCoV.integrated<- FindNeighbors(object = nCoV.integrated, dims = 1:50)
```

```
>nCoV.integrated<- FindClusters(object = nCoV.integrated, resolution = 0.5)
```

```
>nCoV.integrated<- RunTSNE(object = nCoV.integrated, dims = 1:50)
```

```
>DimPlot(object = nCoV.integrated, reduction = 'tsne',label = TRUE)
```

```
>FeaturePlot(nCoV.integrated,features=c("ITGAX", "HLA-DRA", "PLAUR"), cols=c("light Grey",  
"Blue"))
```

```
>VlnPlot(object = nCoV.integrated, features = c("ITGAX"),pt.size = 0)
```

```
>VlnPlot(object = nCoV.integrated, features = c("HLA-DRA"),pt.size = 0)
```

```
>neg_cells = subset(nCoV.integrated,cells=neg_ids)
```

```
>pos_ids = names(which(ITGAX_expression>0.5))
```

```
>pos_cells = subset(neg_cells,cells=pos_ids)
>FeaturePlot(pos_cells,"PLAUR", cols=c("light Grey", "Red"))
```

### **R code for analysis of GSE168710**

```
>Raw.data<- readRDS(choose.files())
> metadata <- readRDS(choose.files())
> data <- CreateSeuratObject(Raw.data, meta.data = metadata, min.cells = 3, min.features = 200)
> data <- FindVariableFeatures(data, selection.method = "vst", nfeatures = 4000, verbose = FALSE)
> data <- ScaleData(data, verbose = FALSE)
>nCoV.integrated<- RunPCA(data, verbose = FALSE,npcs = 100)
>nCoV.integrated<- FindNeighbors(object = nCoV.integrated, dims = 1:50)
>nCoV.integrated<- FindClusters(object = nCoV.integrated, resolution = 1.2)
>nCoV.integrated<- RunTSNE(object = nCoV.integrated, dims = 1:50)
>DimPlot(object = nCoV.integrated, reduction = 'tsne',label = TRUE)
>DimPlot(object = nCoV.integrated, reduction = 'tsne',group.by= "stim",label = TRUE)
>FeaturePlot(nCoV.integrated,features=c("PLAUR"), cols=c("light Grey", "Blue"),label=TRUE)
>VlnPlot(object = nCoV.integrated, features = c("HLA-DRA"),pt.size = 0)
>VlnPlot(object = nCoV.integrated, features = c("ITGAX"),pt.size = 0)
>HLADRA_expression = GetAssayData(object = nCoV.integrated)["HLA-DRA",]
>ITGAX_expression = GetAssayData(object = nCoV.integrated)["ITGAX",]
>neg_ids = names(which(HLADRA_expression<2.5))
>neg_cells = subset(nCoV.integrated,cells=neg_ids)
>pos_ids = names(which(ITGAX_expression>0.8))
>pos_cells = subset(neg_cells,cells=pos_ids)
>FeaturePlot(pos_cells,features=c("PLAUR"), cols=c("light Grey", "Blue"))
>VlnPlot(pos_cells, features = c("PLAUR"),pt.size = 0)
>PLAUR_expression = GetAssayData(object = nCoV.integrated)["PLAUR",]
> PLAUR_2_ids = names(which(PLAUR_expression>2.2))
> PLAUR_2_cells = subset(nCoV.integrated,cells=PLAUR_2_ids)
>DimPlot(object = PLAUR_2_cells, reduction = 'tsne',group.by= "stim",label = TRUE)
```

### Supplemental references:

39. Shaath H et al. Single-Cell Transcriptome Analysis Highlights a Role for Neutrophils and Inflammatory Macrophages in the Pathogenesis of Severe COVID-19. *Cells*. 2020 Oct 29;9(11):2374. doi: 10.3390/cells9112374.
40. O'Brien KD et al. Glycosylphosphatidylinositol-specific phospholipase D is expressed by macrophages in human atherosclerosis and colocalizes with oxidation epitopes. *Circulation*. 1999 Jun 8;99(22):2876-82. doi: 10.1161/01.cir.99.22.2876.
41. Etscheid M et al. Altered structure and function of fibrinogen after cleavage by Factor VII Activating Protease (FSAP). *Biochim Biophys Acta Mol Basis Dis*. 2018 Oct;1864(10):3397-3406. doi: 10.1016/j.bbadis.2018.07.030.
42. Subramaniam S et al. Defective thrombus formation in mice lacking endogenous factor VII activating protease (FSAP). *Thromb Haemost*. 2015 Apr;113(4):870-80. doi: 10.1160/TH14-06-0519.
43. de Jong HK et al. Diabetes-independent increase of factor VII-activating protease activation in patients with Gram-negative sepsis (melioidosis). *J Thromb Haemost*. 2015 Jan;13(1):41-6. doi: 10.1111/jth.12776.
44. Ma Y et al. ITIH4, as an inflammation biomarker, mainly increases in bacterial bloodstream . *Cytokine*. 2021 Feb;138:155377. doi: 10.1016/j.cyto.2020.155377.
45. Lee K-Y et al. Inter-alpha-trypsin inhibitor heavy chain 4: a novel biomarker for environmental exposure to particulate air pollution in patients with chronic obstructive pulmonary disease. *Int J Chron Obstruct Pulmon Dis*. 2015 Apr 24;10:831-41. doi: 10.2147/COPD.S81611.
46. Pihl R et al. ITIH4 acts as a protease inhibitor by a novel inhibitory mechanism. *Sci Adv*. 2021 Jan 8;7(2):eaba7381. doi: 10.1126/sciadv.aba7381.
47. Baralla A et al. Plasma Proteomic Signatures in Early Chronic Obstructive Pulmonary Disease. *Proteomics Clin Appl*. 2018 May;12(3):e1700088. doi: 10.1002/prca.201700088.
48. Wajda A et al. Tissue factor and human apolipoprotein H genetic variants and pro-inflammatory cytokines in systemic lupus erythematosus patients. *Clin Exp Rheumatol*. May-Jun 2021;39(3):587-600.
49. Navab M, Anantharamaiah GM, Fogelman AM. The role of high-density lipoprotein in inflammation. *Trends Cardiovasc Med*. 2005 May;15(4):158-61. doi: 10.1016/j.tcm.2005.05.008.
50. Fuior EV, Gafencu AV. Apolipoprotein C1: Its Pleiotropic Effects in Lipid Metabolism and Beyond. *Int J Mol Sci*. 2019 Nov 26;20(23):5939. doi: 10.3390/ijms20235939.
51. Berbée JFP et al. Apolipoprotein CI stimulates the response to lipopolysaccharide and reduces mortality in gram-negative sepsis. *FASEB J*. 2006 Oct;20(12):2162-4. doi: 10.1096/fj.05-5639fje.
52. Routhier EL et al. Human BIN3 complements the F-actin localization defects caused by loss of Hob3p, the fission yeast homolog of Rvs161p. *J Biol Chem*. 2001 Jun 15;276(24):21670-7. doi: 10.1074/jbc.M101096200.
53. Hudalla H et al. Carbonic Anhydrase Inhibition Ameliorates Inflammation and Experimental Pulmonary Hypertension. *Am J Respir Cell Mol Biol*. 2019 Oct;61(4):512-524. doi: 10.1165/rcmb.2018-0232OC.

54. Henry EK et al. Carbonic anhydrase enzymes regulate mast cell-mediated inflammation. *J Exp Med.* 2016 Aug 22;213(9):1663-73. doi: 10.1084/jem.20151739.
55. Farjo KM et al. Retinol-binding protein 4 induces inflammation in human endothelial cells by an NADPH oxidase- and nuclear factor kappa B-dependent and retinol-independent mechanism. *Mol Cell Biol.* 2012 Dec;32(24):5103-15. doi: 10.1128/MCB.00820-12
56. Scavenius C et al. The Compact and Biologically Relevant Structure of Inter- $\alpha$ -inhibitor Is Maintained by the Chondroitin Sulfate Chain and Divalent Cations. *J Biol Chem.* 2016 Feb 26;291(9):4658-70. doi: 10.1074/jbc.M115.678748.
57. Lord MS et al. The Inter- $\alpha$ -Trypsin Inhibitor Family: Versatile Molecules in Biology and Pathology. *J Histochem Cytochem.* 2020 Dec;68(12):907-927. doi: 10.1369/0022155420940067.
58. Fang S et al. Decreased complement C3 levels are associated with poor prognosis in patients with COVID-19: A retrospective cohort study. *Int Immunopharmacol.* 2020 Dec;89(Pt A):107070. doi: 10.1016/j.intimp.2020.107070.
59. Spicer BA et al. The first transmembrane region of complement component-9 acts as a brake on its self-assembly. *Nat Commun.* 2018 Aug 15;9(1):3266. doi: 10.1038/s41467-018-05717-0.
60. Soames CJ, Sim RB. Interactions between human complement components factor H, factor I and C3b. *Biochem J.* 1997 Sep 1;326 ( Pt 2)(Pt 2):553-61. doi: 10.1042/bj3260553.
61. Lachmann PJ, Müller-Eberhard HJ. The demonstration in human serum of "conglutinin-activating factor" and its effect on the third component of complement. *J Immunol.* 1968 Apr;100(4):691-8.
62. Kavanagh D, Goodship TH, Richards A. Atypical hemolytic uremic syndrome. *Semin Nephrol.* 2013 Nov;33(6):508-30. doi: 10.1016/j.semnephrol.2013.08.003.
63. Morena-Barrio ME et al. Prognostic value of thrombin generation parameters in hospitalized COVID-19 patients. *Sci Rep.* 2021 Apr 8;11(1):7792. doi: 10.1038/s41598-021-85906-y.
64. Zhou A et al. How vitronectin binds PAI-1 to modulate fibrinolysis and cell migration. *Nat Struct Biol.* 2003 Jul;10(7):541-4. doi: 10.1038/nsb943.
65. Conti F et al. Expression of the membrane attack complex of complement and its inhibitors during human liver allograft transplantation. *J Hepatol.* 1997 Nov;27(5):881-9. doi: 10.1016/s0168-8278(97)80326-1.
66. Watanabe H et al. An acute phase protein  $\alpha$  1-acid glycoprotein mitigates AKI and its progression to CKD through its anti-inflammatory action. *Sci Rep.* 2021 Apr 12;11(1):7953. doi: 10.1038/s41598-021-87217-8.
67. Ceciliani F, Lecchi C. The Immune Functions of  $\alpha$  1 Acid Glycoprotein. *Curr Protein Pept Sci.* 2019;20(6):505-524. doi: 10.2174/1389203720666190405101138.
68. Zhang Y et al. Coagulopathy and Antiphospholipid Antibodies in Patients with Covid-19. *N Engl J Med.* 2020 Apr 23;382(17):e38. doi: 10.1056/NEJMc2007575.
69. Yin ET, Wessler S, Stoll PJ. Identity of plasma-activated factor X inhibitor with antithrombin 3 and heparin cofactor. *J Biol Chem.* 1971 Jun 10;246(11):3712-9.

70. Matsumoto H et al. Decreased antithrombin activity in the early phase of trauma is strongly associated with extravascular leakage, but not with antithrombin consumption: a prospective observational study. *Thromb J*. 2018 Aug 1;16:17. doi: 10.1186/s12959-018-0171-7.

71. Pilling D, Gomer RH. The Development of Serum Amyloid P as a Possible Therapeutic. *Front Immunol*. 2018 Oct 16;9:2328. doi: 10.3389/fimmu.2018.02328.
